# Supplementary material for: Development of a sensitive indirect competitive enzyme-linked immunosorbent assay based on the monoclonal antibody for the detection of benzothiostrobin residue
Source: Royal Society of Chemistry journal article supplement (doi:10.1039/c4ra01845a), 2014-01-01
Supplement: c4ra01845a1.pdf [file c4ra01845a1.pdf]

## Supporting Information

**Table 1S** Effect of organic solvent, ionic strength and pH value on immunoassay

**Fig. 1S** Ultraviolet absorption spectra of hapten, BSA, OVA, immunogen and coating antigen

**Fig. 2S** Matrix effect of tomato sample on the sensitivity of the immunoassays

**Fig. 3S** Matrix effect of pear sample on the sensitivity of the immunoassays

**Fig. 4S** Matrix effect of rice sample on the sensitivity of the immunoassays

**Fig. 5S** Matrix effect of soil sample on the sensitivity of the immunoassays

**Fig. 6S** Correlation between the ELISA and HPLC for the spiked samples

**Table 1S** Effect of organic solvent, ionic strength and pH value on immunoassay

| Factors             | ELISA                   |                  |         |          |       |
|---------------------|-------------------------|------------------|---------|----------|-------|
|                     | $A_{\max} / IC_{50}$    | $IC_{50}$ (ug/L) | $R^2$   |          |       |
| Methanol<br>(v/v,%) | 5%                      | 0.036            | 32.360  | 0.994    |       |
|                     | 10%                     | 0.029            | 38.400  | 0.982    |       |
|                     | 15%                     | 0.015            | 74.300  | 0.987    |       |
|                     | 20%                     | 0.018            | 66.150  | 0.988    |       |
|                     | 30%                     | 0.008            | 132.640 | 0.978    |       |
|                     | 40%                     | 0.007            | 176.300 | 0.979    |       |
|                     | Na <sup>+</sup> (mol/L) | 0.1              | 0.001   | 1549.030 | 0.987 |
|                     |                         | 0.2              | 0.001   | 131.700  | 0.986 |
| 0.3                 |                         | 0.036            | 31.800  | 0.995    |       |
| 0.4                 |                         | 0.028            | 39.490  | 0.984    |       |
| 0.5                 |                         | 0.015            | 70.440  | 0.981    |       |
| pH value            | 5.5                     | 0.096            | 8.920   | 0.988    |       |
|                     | 6.5                     | 0.122            | 8.020   | 0.995    |       |
|                     | 7.5                     | 0.113            | 8.130   | 0.994    |       |
|                     | 8.5                     | 0.0764           | 4.660   | 0.987    |       |

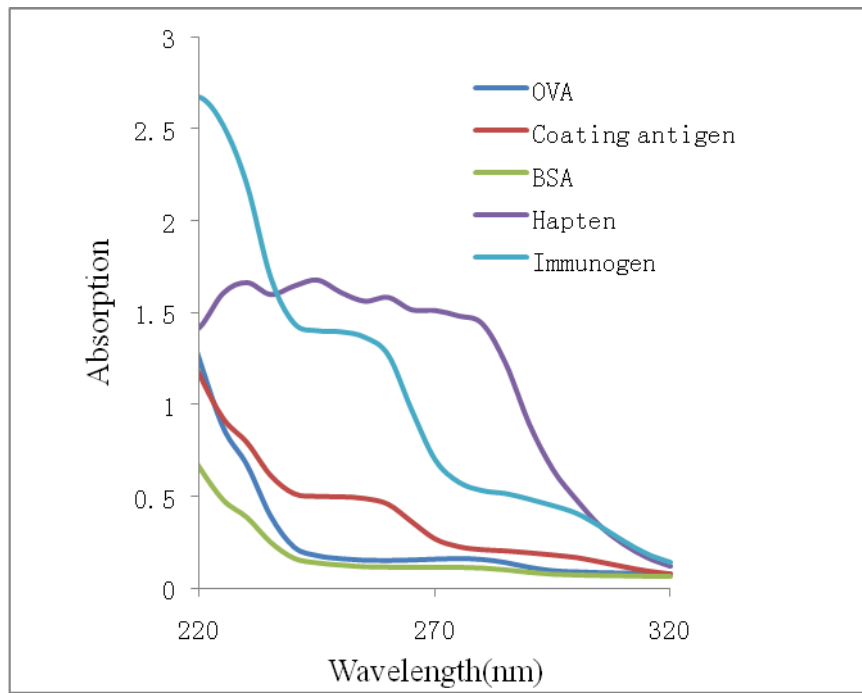

**Fig. 1S** Ultraviolet absorption spectra of hapten, BSA, OVA, immunogen and coating antigen

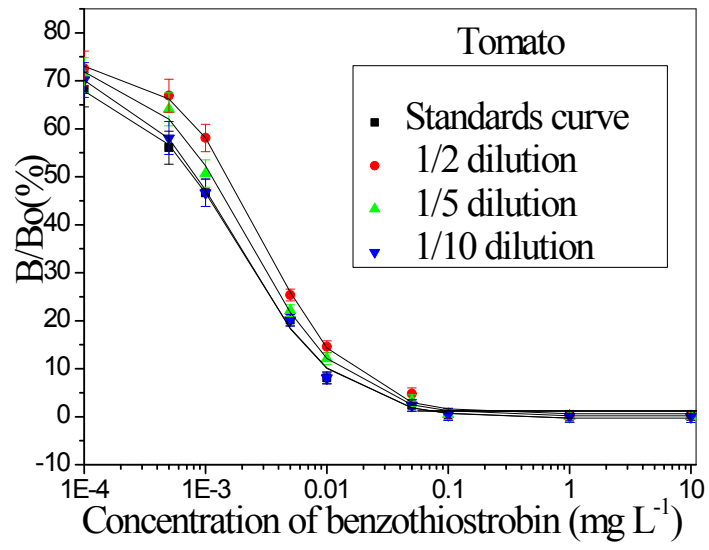

**Fig. 2S** Matrix effect of tomato sample on the sensitivity of the immunoassays

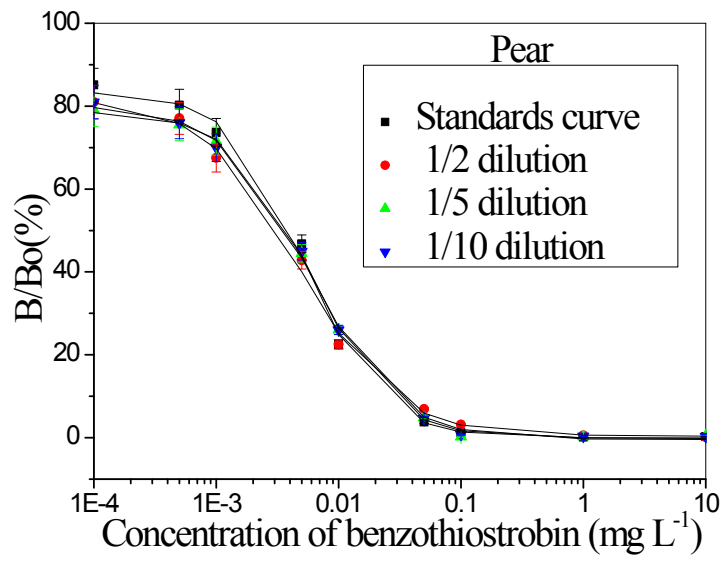

**Fig. 3S** Matrix effect of pear sample on the sensitivity of the immunoassays

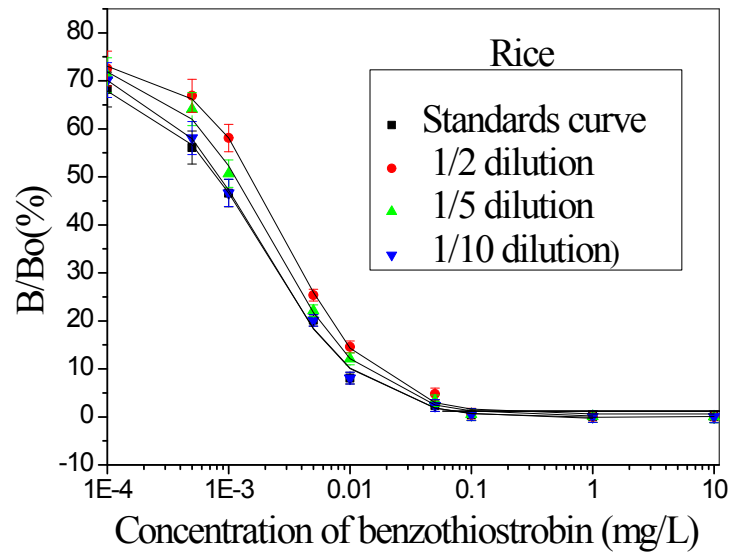

Fig. 4S Matrix effect of rice sample on the sensitivity of the immunoassays

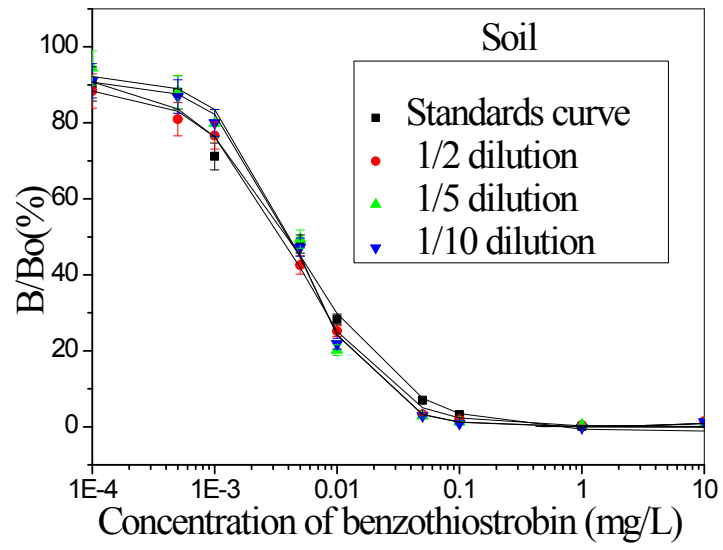

**Fig. 5S** Matrix effect of soil sample on the sensitivity of the immunoassays

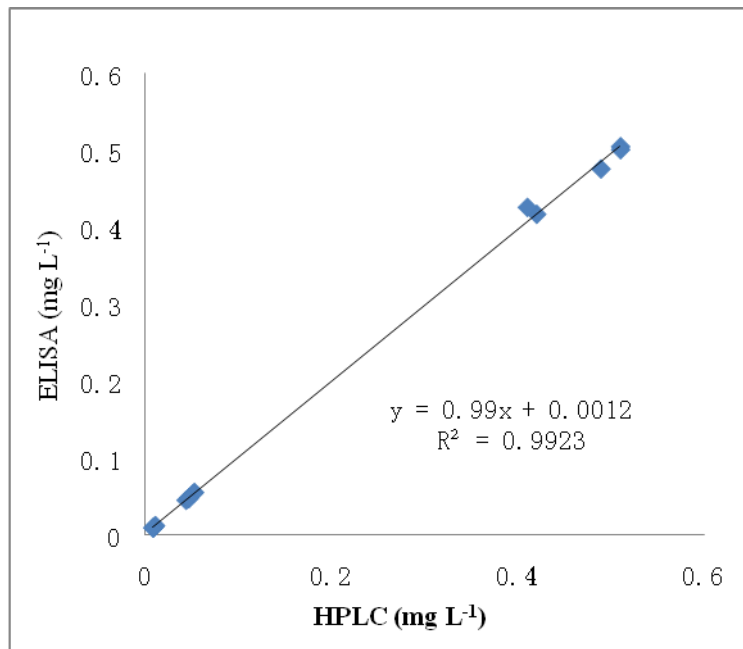

**Fig. 6S** Correlation between the ELISA and HPLC for the spiked samples
